# Supplementary material
Source: PubMed Central journal article supplement (PMC129348)

**T lymphocytes**

No lysate

Jurkats I+P

NS

CD3

CD3 + CD28

Bound IL-2 NFAT binding site →

Free IL-2 NFAT binding site →

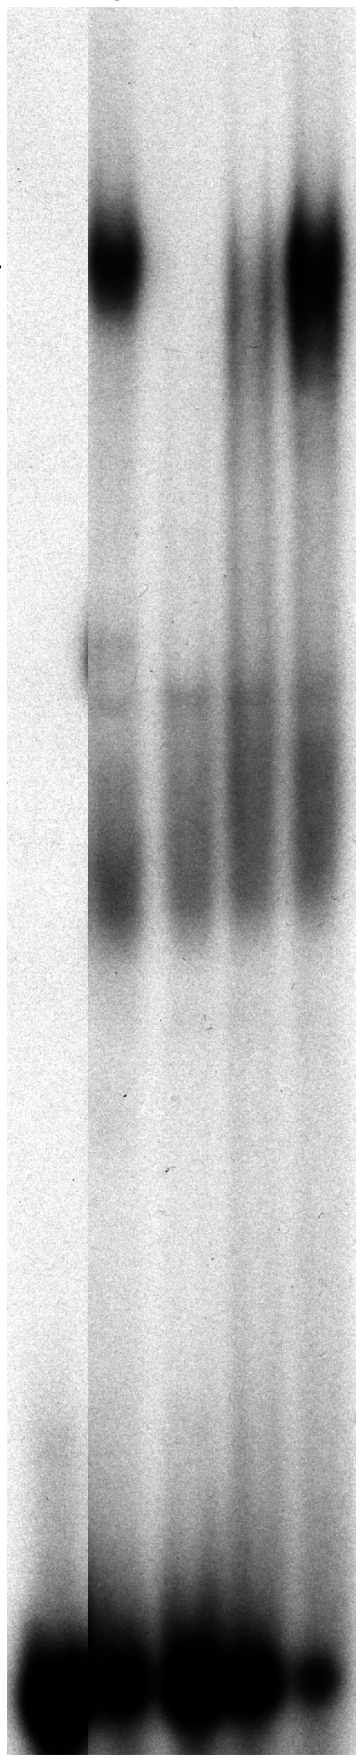

Supplement: pnas_092284399_14.pdf [file pnas_092284399_14.pdf]
