# Supplementary material
Source: PubMed Central journal article supplement (PMC129348)

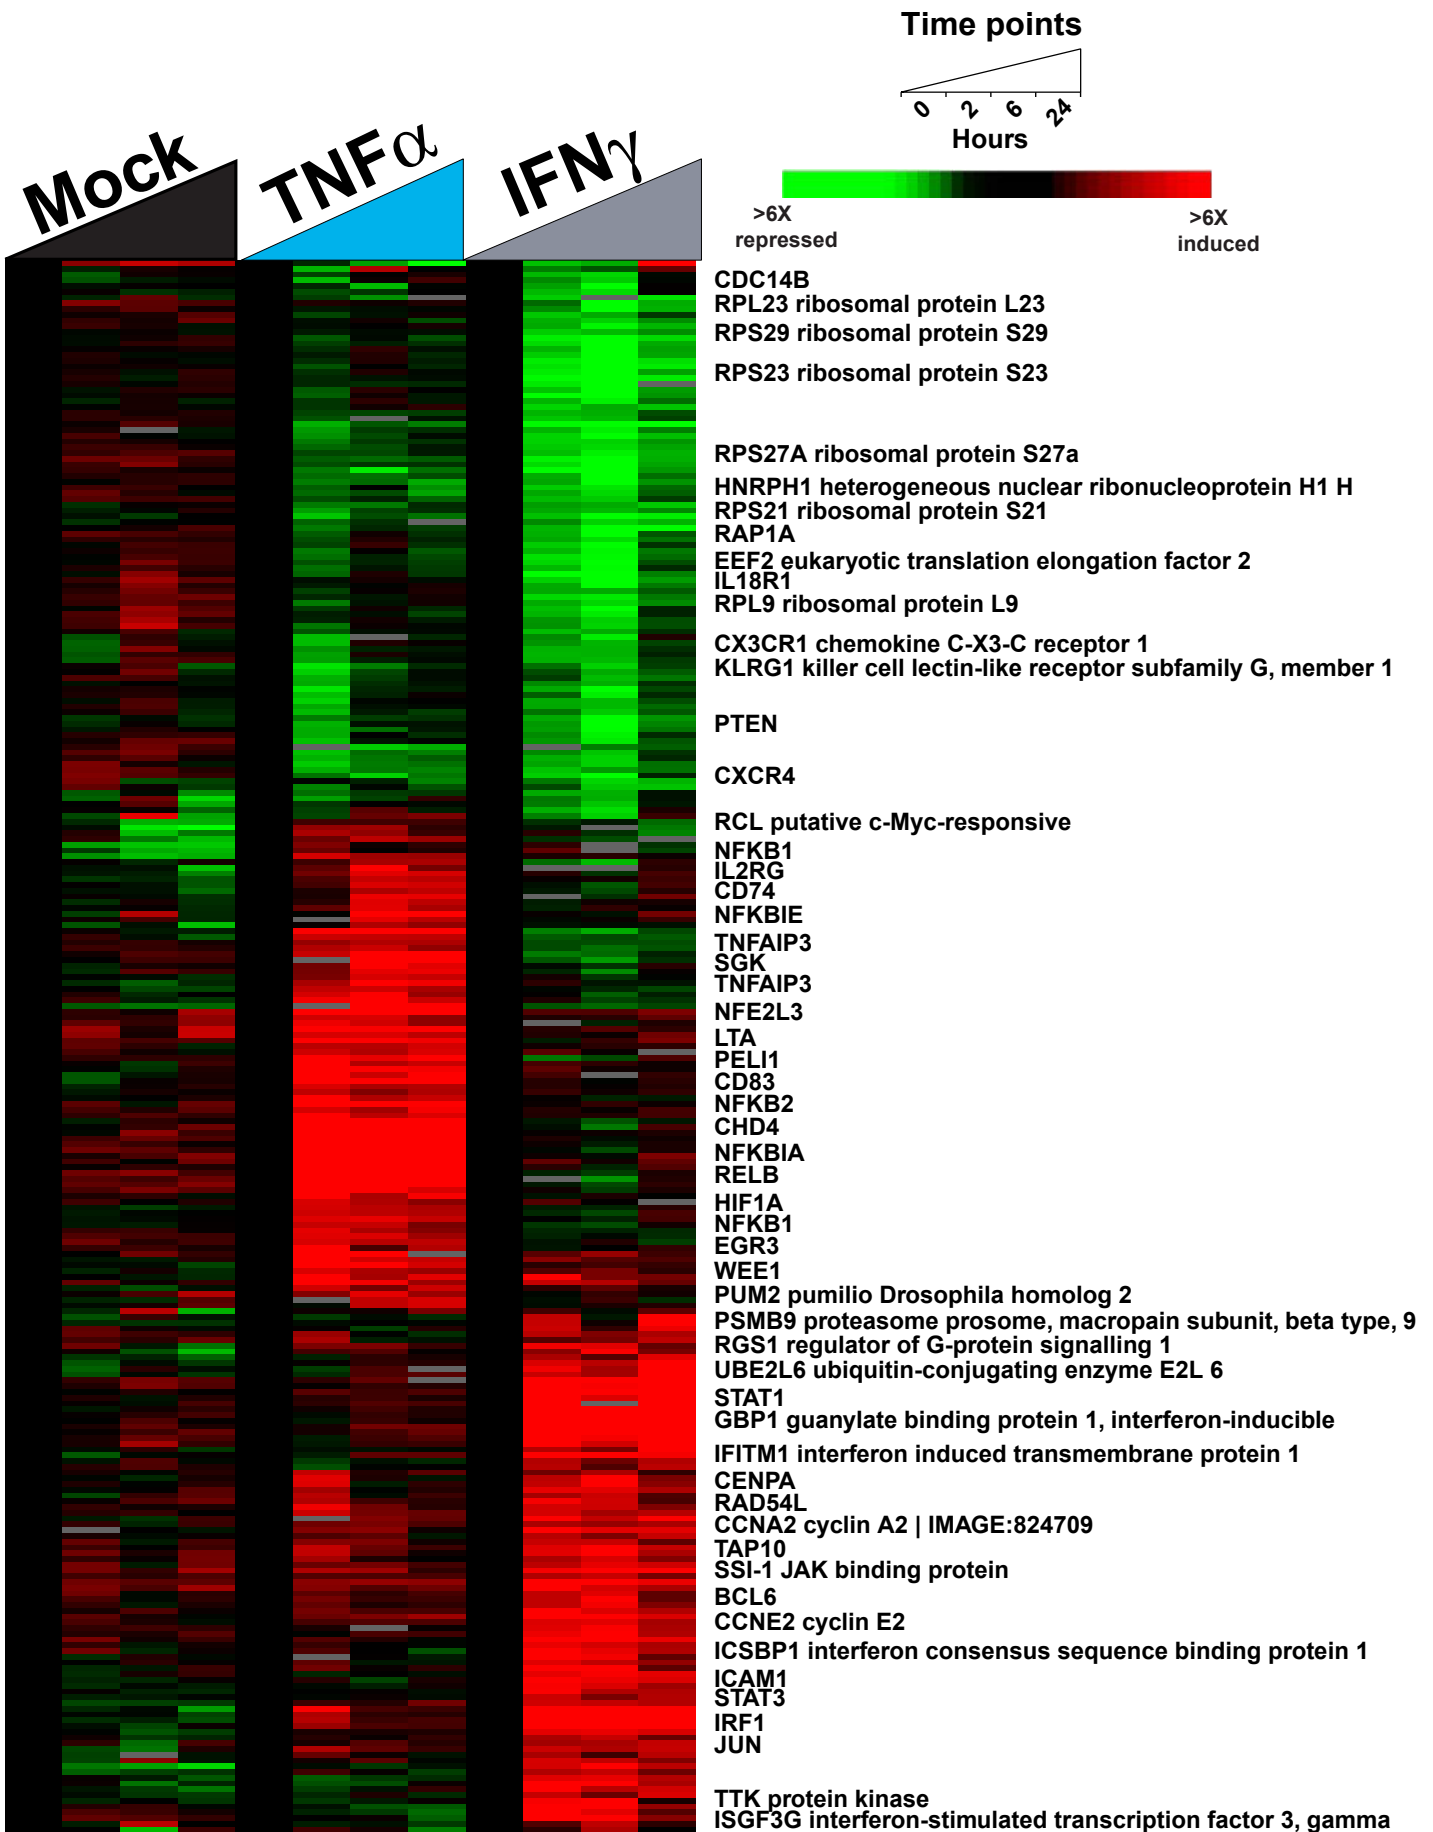

Supplement: pnas_092284399_10.pdf [file pnas_092284399_10.pdf]

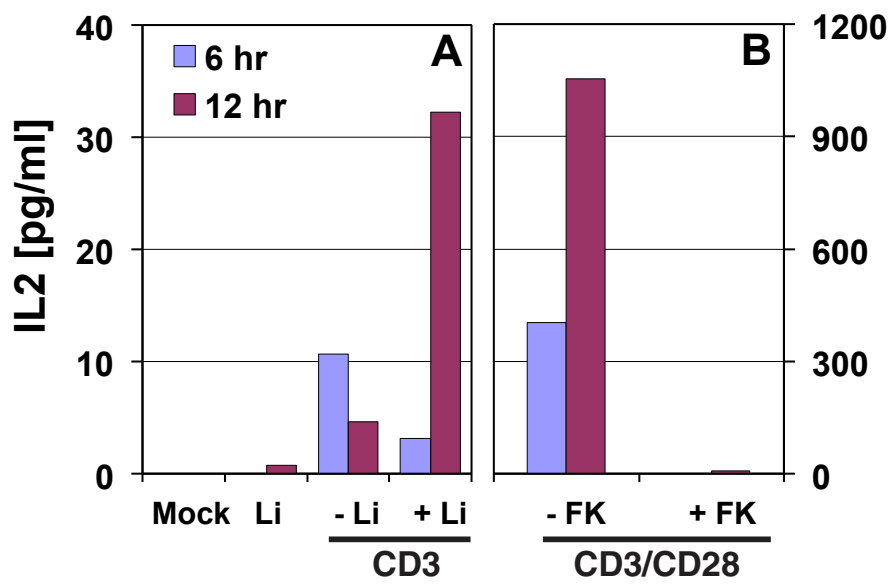

Supplement: pnas_092284399_11.pdf [file pnas_092284399_11.pdf]

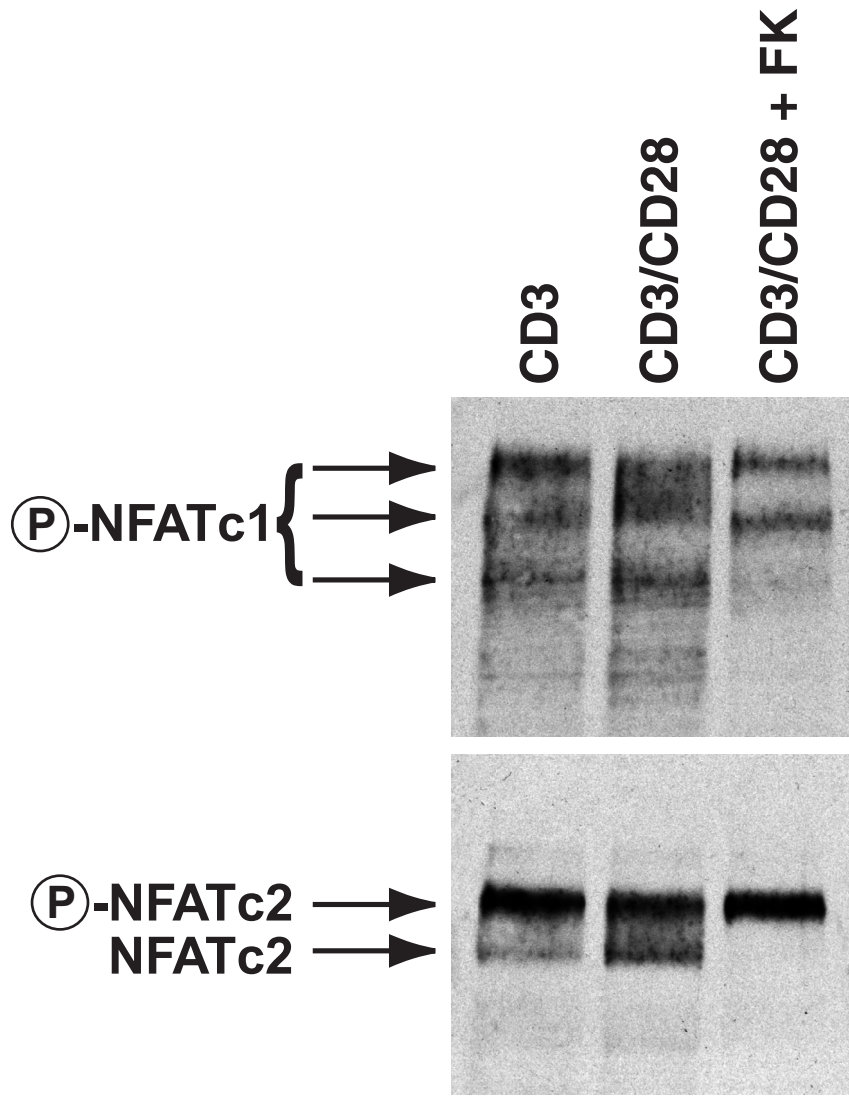

Supplement: pnas_092284399_12.pdf [file pnas_092284399_12.pdf]

**Nuclear**

---

**NS**

**CD3**

**CD3/CD28**

**NFATc2**

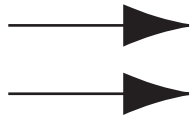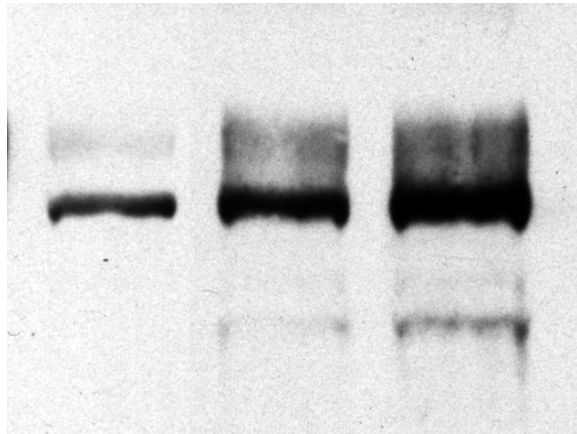

**BRG1**

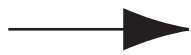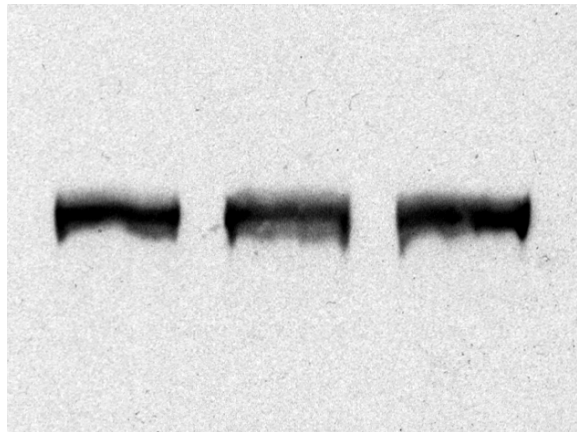

Supplement: pnas_092284399_13.pdf [file pnas_092284399_13.pdf]

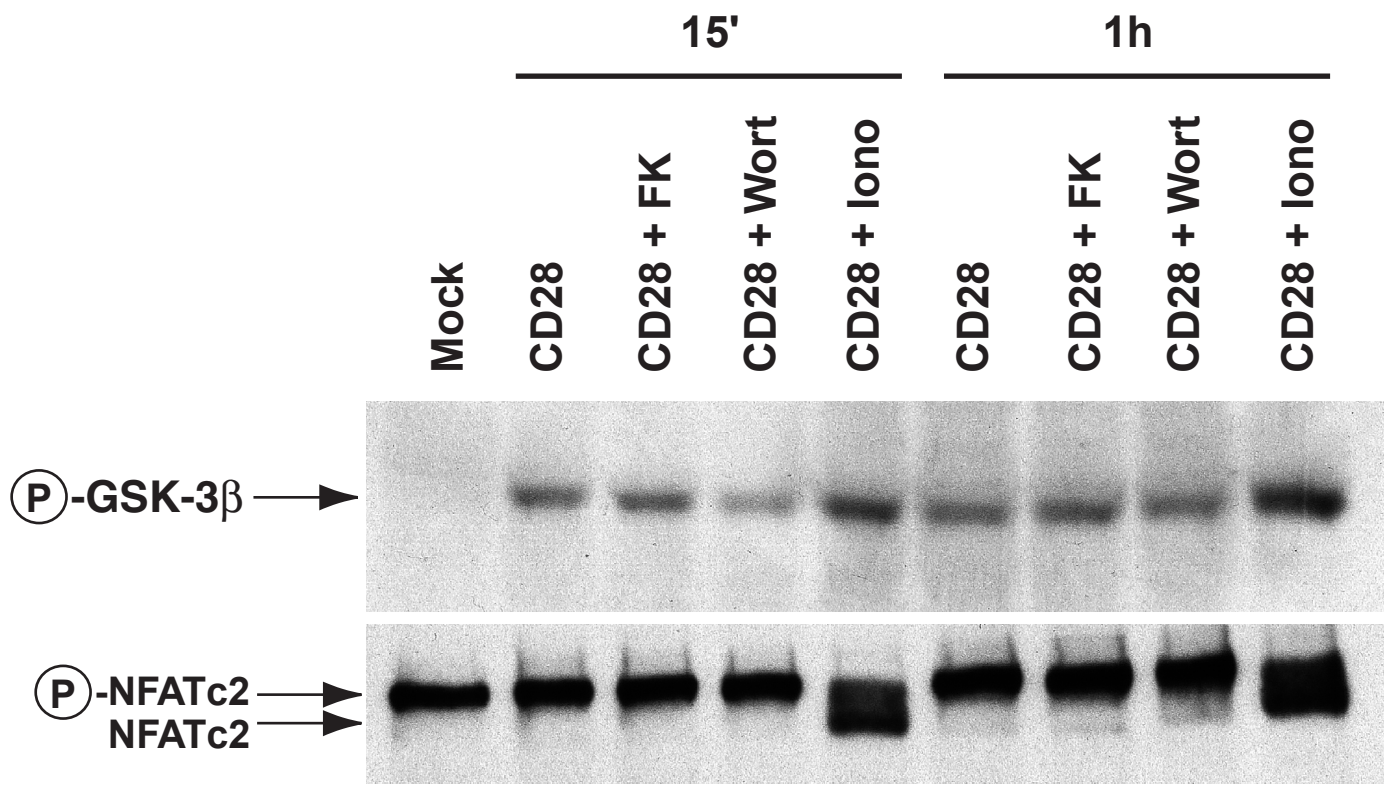

Supplement: pnas_092284399_15.pdf [file pnas_092284399_15.pdf]

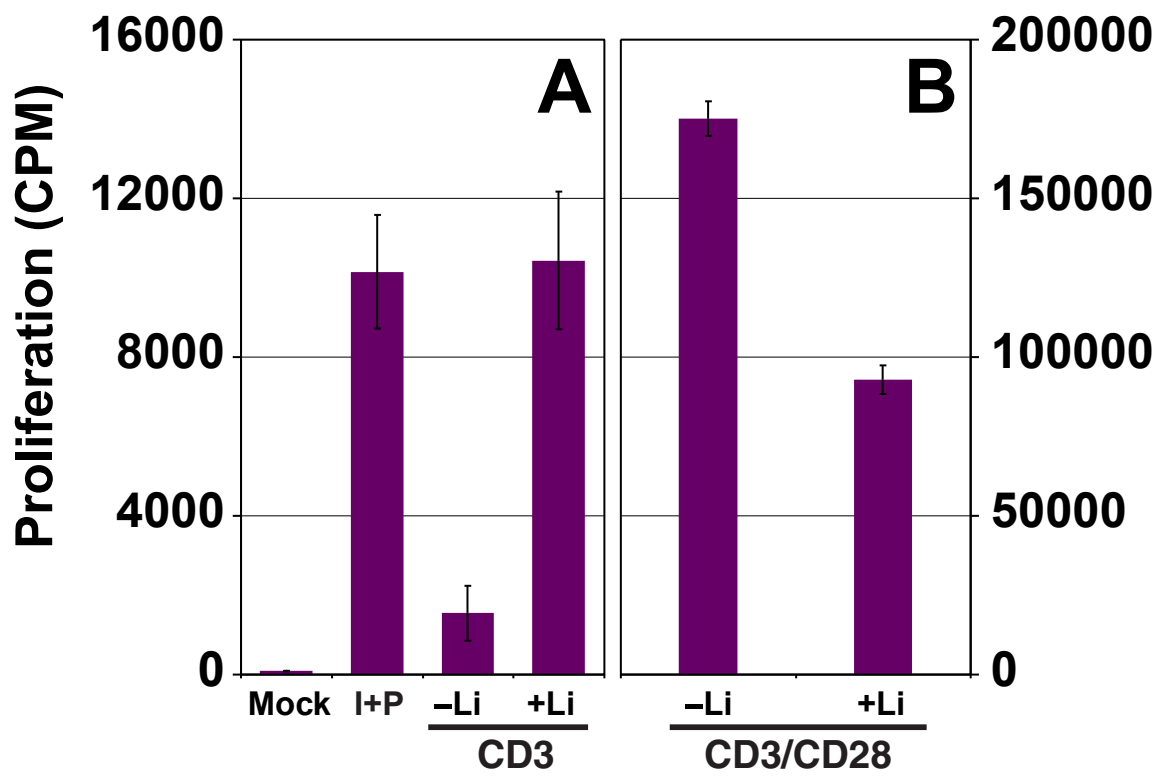

Supplement: pnas_092284399_16.pdf [file pnas_092284399_16.pdf]

**CD69**

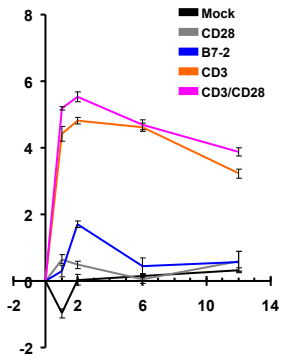

**TNF**

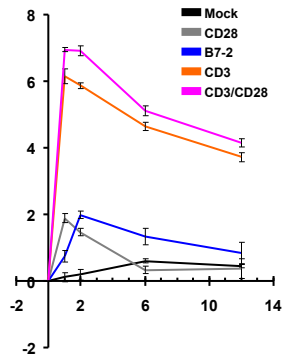

**TNFAIP3**

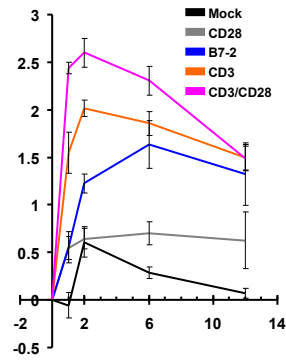

**NFKBIA**

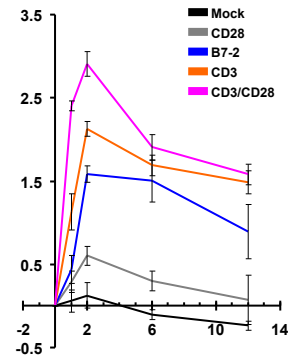

Supplement: pnas_092284399_17.pdf [file pnas_092284399_17.pdf]
